# Supplementary material
Source: publisher figshare collection journal article supplement (https://tandf.figshare.com/ndownloader/files/17889971)
Supplement: Supplementary file 1 [file 17889971]

**Supplementary Table S1.** A Revised version of the Disability Attitudes in Health Care scale

**DIRECTIONS:** Please use the scale to indicate the degree to which you agree or disagree with each statement. There are no right or wrong answers. The best response is the one that truly reflects your personal opinion.

|                                                                                                             | 1        | 2       | 3                 | 4                 |
|-------------------------------------------------------------------------------------------------------------|----------|---------|-------------------|-------------------|
| 1. People with disabilities are pleasant to be with.                                                        | Disagree | Neutral | Somewhat Agree    | Strongly Agree    |
| 2. It is society's responsibility to provide care for its persons with disabilities.                        | Disagree | Neutral | Somewhat Agree    | Strongly Agree    |
| 3. Patients with disability improve with treatment.                                                         | Disagree | Neutral | Somewhat Agree    | Strongly Agree    |
| 4. Medical care for people with disabilities uses up too many resources.                                    | Agree    | Neutral | Somewhat Disagree | Strongly Disagree |
| 5. Taking a medical history from a patient with disability is frequently an ordeal.                         | Agree    | Neutral | Somewhat Disagree | Strongly Disagree |
| 6. People with disability, in general, do not contribute much to society.                                   | Agree    | Neutral | Somewhat Disagree | Strongly Disagree |
| 7. People with disability don't contribute their fair share towards paying for their health care.           | Agree    | Neutral | Somewhat Disagree | Strongly Disagree |
| 8. I will welcome patients with disability into my practice.                                                | Disagree | Neutral | Somewhat Agree    | Strongly Agree    |
| 9. If handled properly, the patient with disability can be seen as quickly as any other patient.            | Disagree | Neutral | Somewhat Agree    | Strongly Agree    |
| 10. Understanding my patients with disabilities is valuable to me as a physician.                           | Disagree | Neutral | Somewhat Agree    | Strongly Agree    |
| 11. Patients with disability are better off in nursing homes.                                               | Agree    | Neutral | Somewhat Disagree | Strongly Disagree |
| 12. The treatment of patients with disability is too time-consuming.                                        | Agree    | Neutral | Somewhat Disagree | Strongly Disagree |
| 13. More training is needed to prepare health practitioners to provide care to the patient with disability. | Disagree | Neutral | Somewhat Agree    | Strongly Agree    |
| 14. It is unglamorous to care for people with disability                                                    | Agree    | Neutral | Somewhat Disagree | Strongly Disagree |
| 15. Treatment of people with disability is hopeless.                                                        | Agree    | Neutral | Somewhat Disagree | Strongly Disagree |
